# Supplementary material for: CoO/Co3O4 heterostructures with intimate contact promote photocatalytic CO2 reduction
Source: Royal Society of Chemistry journal article supplement (doi:10.1039/d6ra02788a), 2026-04-30
Supplement: d6ra02788a1.pdf [file d6ra02788a1.pdf]

## Supporting Information

### **CoO/Co<sub>3</sub>O<sub>4</sub> heterostructures with intimate contact promote photocatalytic CO<sub>2</sub> reduction**

Zhidong Yang,\* Xuelin Yang, Xikang Ding and Peixia Li \*

School of chemistry and Environment, Ankang University, Ankang 725000, Shanxi, China.

\*Corresponding authors:

E-mail: yangzd1618@163.com; 1485276@163.com.

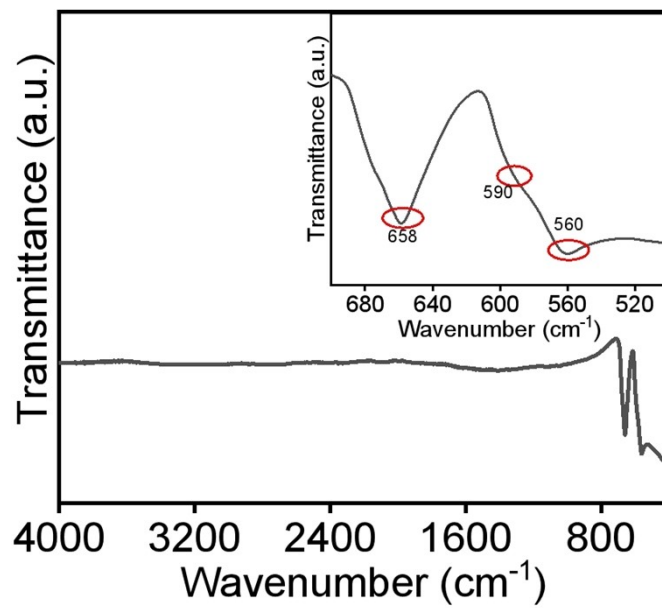

Fig. S1 FT-IR spectrum of obtained CoO/Co<sub>3</sub>O<sub>4</sub>.

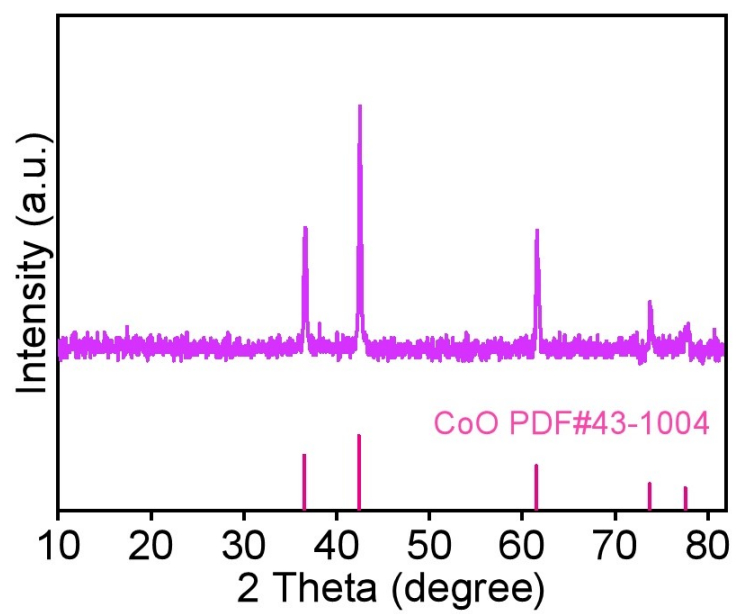

Fig. S2 X-ray diffraction (XRD) pattern of C-CoO.

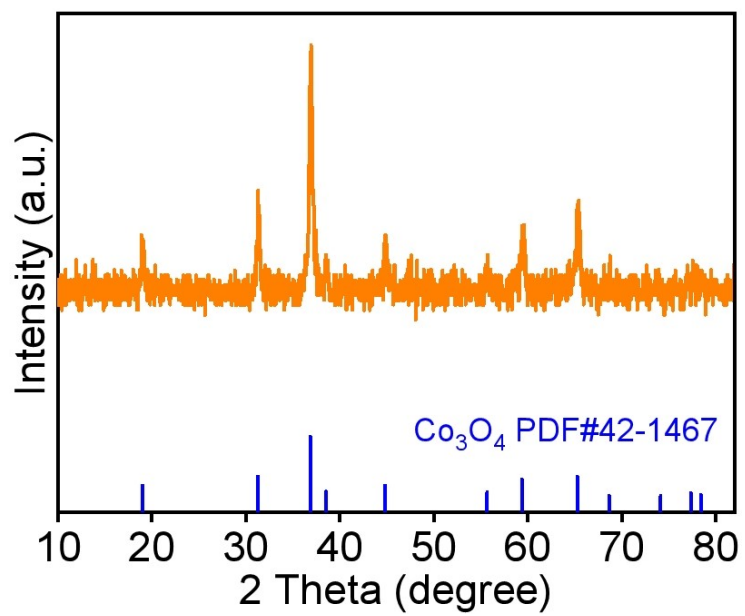

**Fig. S3** X-ray diffraction (XRD) pattern of T-Co<sub>3</sub>O<sub>4</sub>.

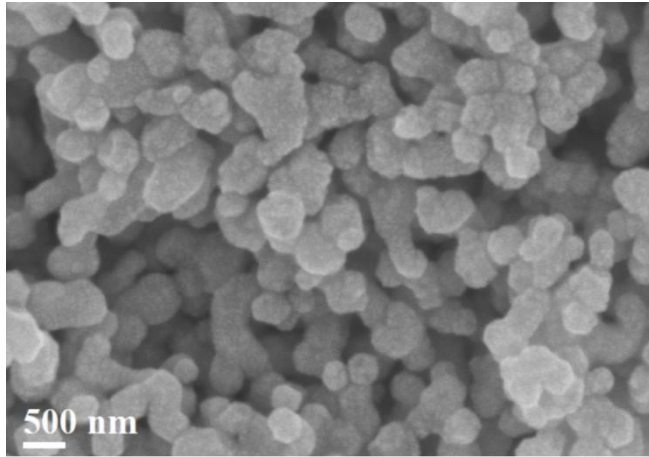

**Fig. S4** Field emission scanning electron microscopic (FESEM) image of C-CoO.

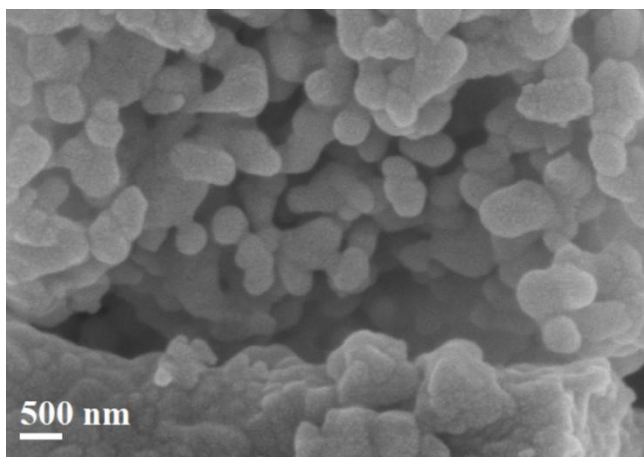

**Fig. S5** Field emission scanning electron microscopic (FESEM) image of T-Co<sub>3</sub>O<sub>4</sub>.

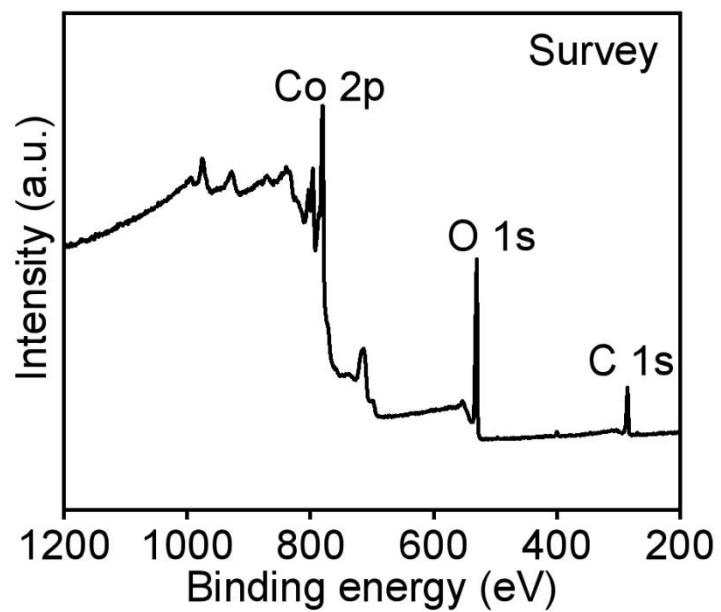

Fig. S6 XPS survey spectra of C-CoO.

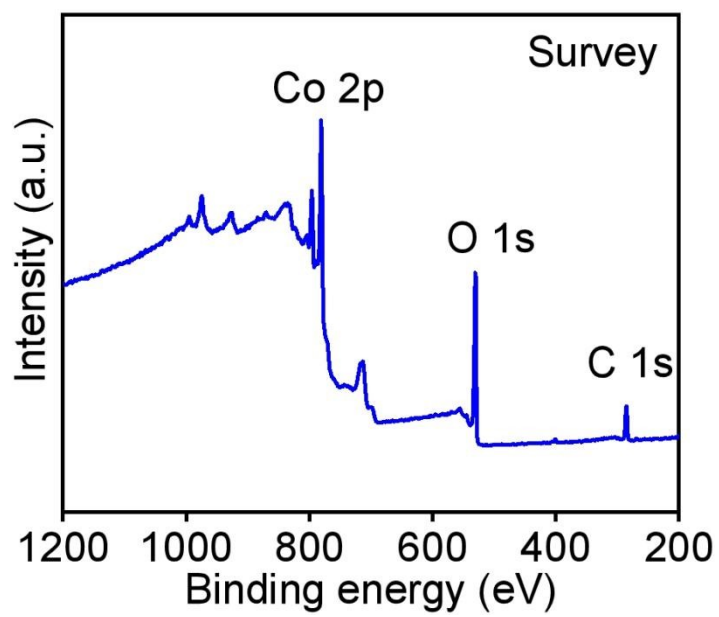

Fig. S7 XPS survey spectra of T-Co<sub>3</sub>O<sub>4</sub>.

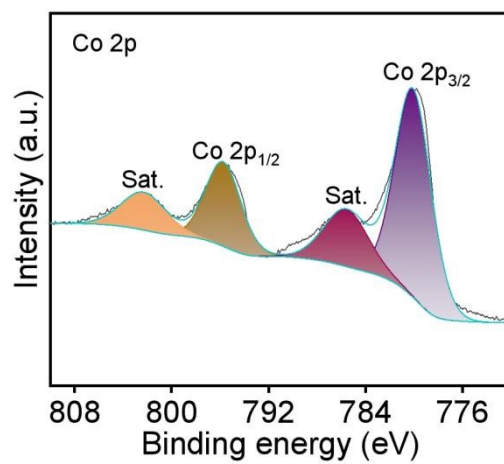

**Fig. S8** High-resolution XPS spectra of Co 2p of C-CoO.

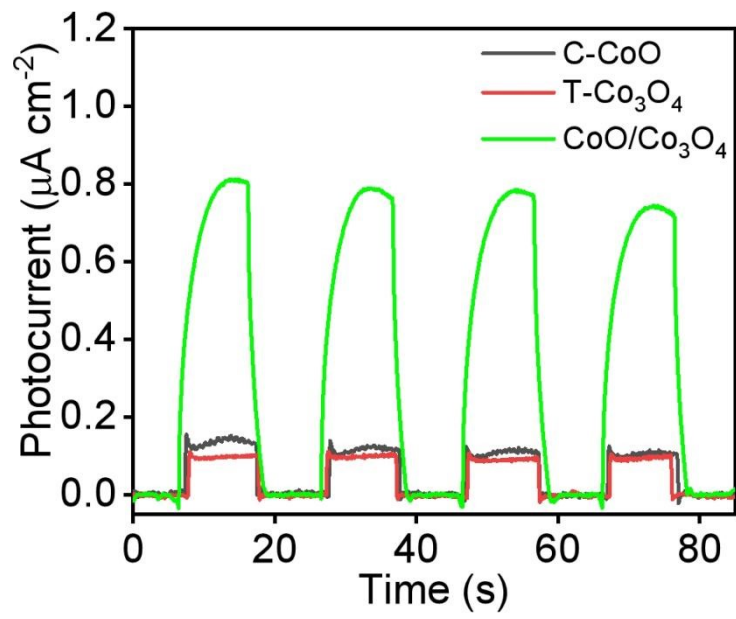

Fig. S9 Transient photocurrent curves of C-CoO, T-Co<sub>3</sub>O<sub>4</sub> and CoO/Co<sub>3</sub>O<sub>4</sub>.

**Table S1.** Comparison of the photocatalytic CO<sub>2</sub> reduction activities of metal oxide-based photocatalysts.

| Photocatalyst                                     | Light source                   | Conditions                                                 | Dosage | CO<br>( $\mu\text{mol g}^{-1} \text{h}^{-1}$ ) | CH <sub>4</sub><br>( $\mu\text{mol g}^{-1} \text{h}^{-1}$ ) | Ref          |
|---------------------------------------------------|--------------------------------|------------------------------------------------------------|--------|------------------------------------------------|-------------------------------------------------------------|--------------|
| CoO@N-GC-500                                      | UV-Vis light:<br>300 W Xe lamp | CO <sub>2</sub> and<br>H <sub>2</sub> O vapor              | 50 mg  | 5.16                                           | 10.03                                                       | 1            |
| Co@Ni/GC-700                                      | UV-Vis light:<br>300 W Xe lamp | CO <sub>2</sub> and<br>H <sub>2</sub> O vapor              | 50 mg  | 4.89                                           | 9.79                                                        | 2            |
| ZnO@Co <sub>3</sub> O <sub>4</sub>                | UV-Vis light:<br>300 W Xe lamp | CO <sub>2</sub> and<br>H <sub>2</sub> O vapor              | 100 mg | 6.50                                           | 0.99                                                        | 3            |
| NiO/g-C <sub>3</sub> N <sub>4</sub>               | UV-Vis light:<br>300 W Xe lamp | CO <sub>2</sub> , H <sub>2</sub> O,<br>triethanola<br>mine | 20 mg  | 2.75                                           | 1.79                                                        | 4            |
| MnO <sub>2</sub> /g-C <sub>3</sub> N <sub>4</sub> | UV-Vis light:<br>300 W Xe lamp | CO <sub>2</sub> and<br>H <sub>2</sub> O vapor              | 50 mg  | /                                              | 9.6                                                         | 5            |
| 15%CuO/g-C <sub>3</sub> N <sub>4</sub>            | UV-Vis light:<br>300 W Xe lamp | CO <sub>2</sub> and<br>H <sub>2</sub> O vapor              | 50 mg  | 3.78                                           | /                                                           | 6            |
| Ordered<br>mesoporous TiO <sub>2</sub>            | UV-Vis light:<br>300 W Xe lamp | CO <sub>2</sub> and<br>H <sub>2</sub> O vapor              | 100 mg | 0.19                                           | 0.15                                                        | 7            |
| Co-OMT-4                                          | UV-Vis light:<br>300 W Xe lamp | CO <sub>2</sub> and<br>H <sub>2</sub> O vapor              | 100 mg | 2.09                                           | 0.33                                                        | 8            |
| CoO/Co <sub>3</sub> O <sub>4</sub>                | 300W Xe lamp                   |                                                            | 20 mg  | 9.95                                           | /                                                           | This<br>work |

## References

- 1 L. He, W. Zhang, S. Liu, Y. Zhao, *Appl. Catal. B-Environ.*, 2021, 298, 120546.
- 2 L. He, W. Zhang, S. Liu, Y. Zhao, *J. Alloy Compd.*, 2023, 934, 168053.
- 3 T. Wang, L. Shi, J. Tang, V. Malgras, S. Asahin, G. Liu, H. Zhang, X. Meng, K. Chang, J. He, O. Terasaki, Y. Yamauchi, J. Ye, *Nanoscale*, 2016, 8, 6712-6720.
- 4 L. Wang, Y. Dong, J. Zhang, F. Tao, J. Xu, *J. Solid State Chem.*, 2022, 308, 122878.
- 5 M. Wang, M. Shen, L. Zhang, J. Tian, X. Jin, Y. Zhou, J. Shi, *Carbon*, 2017, 120, 23-31.
- 6 M. Li, Y. Wu, E. Gu, W. Song, D. Zeng, *J. Alloy Compd.*, 2022, 914, 165339.
- 7 T. Wang, X. Meng, P. Li, S. Ouyang, K. Chang, G. Liu, Z. Mei, J. Ye, *Nano Energy*, 2014, 9, 50-60.
- 8 T. Wang, X. Meng, G. Liu, K. Chang, P. Li, Q. Kang, L. Liu, M. Li, S. Ouyang, J. Ye, *J. Mater. Chem. A*, 2015, 3, 9491-9501.
